# Supplementary material for: Mannose antagonizes GSDME-mediated pyroptosis through AMPK activated by metabolite GlcNAc-6P
Source: Springer Nature journal article supplement (doi:10.1038/s41422-023-00848-6), 2023-07-17
Supplement: MOESM13 [file 41422_2023_848_MOESM13_ESM.pdf]

**Supplementary information, Video S1 Time-lapse analysis for pyroptosis of small intestinal organoids treated with cisplatin.** Small intestinal organoids were treated with cisplatin (20  $\mu\text{g/mL}$ ) for 12 h. Propidium iodide (5  $\mu\text{g/mL}$ , red) was used to indicate the occurrence of pyroptosis.

**Supplementary information, Video S2 Time-lapse analysis for pyroptosis of small intestinal organoids treated with cisplatin and mannose.** Small intestinal organoids were treated with cisplatin (20  $\mu\text{g/mL}$ ) and mannose (20 mM) for 12 h. Propidium iodide (5  $\mu\text{g/mL}$ , red) was used to indicate the occurrence of pyroptosis.
